# Supplementary material for: Heterotaxy in Caenorhabditis: widespread natural variation in left–right arrangement of the major organs
Source: PubMed Central journal article supplement (PMC5104504; doi:10.1098/rstb.2015.0404), 2016-12-19
Supplement: rstb20150404supp1.pdf [file rstb20150404supp1.pdf]

**Supplementary Figure 1:** The propensity for L/R gut-gonad reversals varies widely in males of *C. elegans* isolates at 20°C. In figure 2, isolates are numbered in ascending order. This figure includes lower and upper bounds for 95% Binomial proportion confidence intervals calculated using the Clopper-Pearson/Exact method (See Materials and Methods).

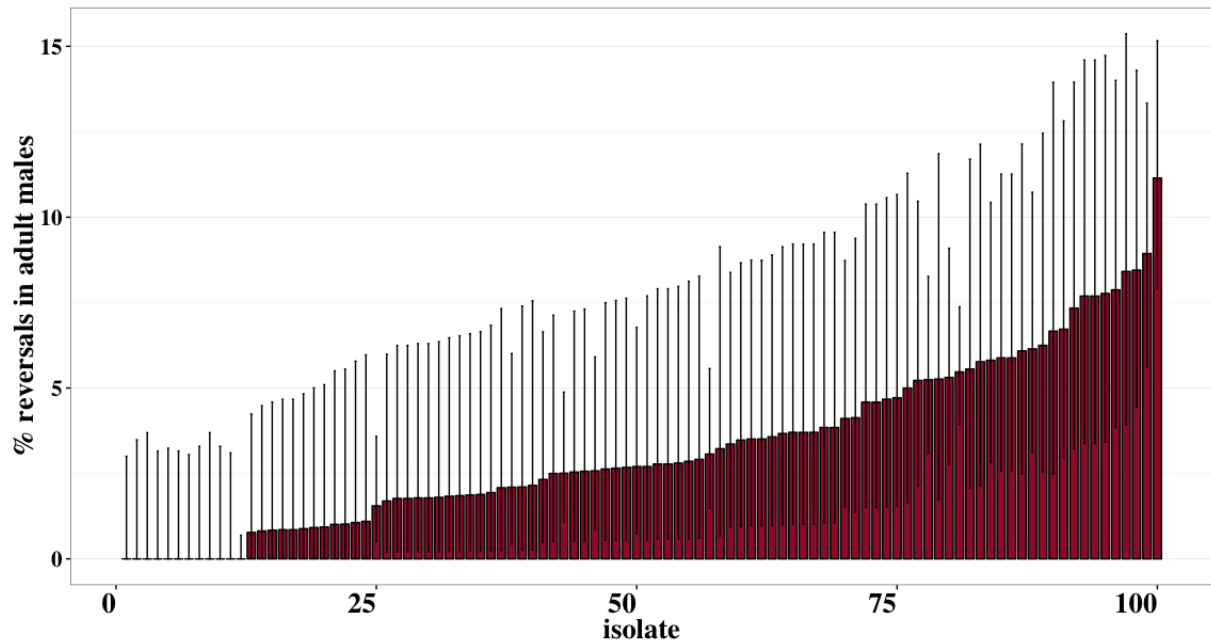

**Supplementary Table 1:** Complementary data for Figure 2: The propensity for L/R gut-gonad reversals varies widely in males of *C. elegans* isolates at 20°C. In figure 2, isolates are numbered in ascending order. This table includes isolate name, total sample size, percent reversals and the lower and upper bounds for 95% Binomial proportion confidence intervals which were calculated using the Clopper-Pearson/Exact method (See Materials and Methods). The full data set including confidence intervals is depicted in Supplemental Figure 1.

| Isolate Number | Isolate | Total Sample Size | % Reversals | Lower Bound % | Upper Bound % |
|----------------|---------|-------------------|-------------|---------------|---------------|
| 1              | AB4     | 121               | 0.00        | 0.00          | 3.00          |
| 2              | CB4857  | 104               | 0.00        | 0.00          | 3.48          |
| 3              | CX11292 | 98                | 0.00        | 0.00          | 3.69          |
| 4              | ED3012  | 115               | 0.00        | 0.00          | 3.16          |
| 5              | JU1088  | 112               | 0.00        | 0.00          | 3.24          |
| 6              | JU1440  | 115               | 0.00        | 0.00          | 3.16          |
| 7              | JU1530  | 119               | 0.00        | 0.00          | 3.05          |
| 8              | JU360   | 110               | 0.00        | 0.00          | 3.30          |

|           |         |     |      |      |      |
|-----------|---------|-----|------|------|------|
| <b>9</b>  | JU394   | 98  | 0.00 | 0.00 | 3.69 |
| <b>10</b> | JU561   | 110 | 0.00 | 0.00 | 3.30 |
| <b>11</b> | MY10    | 117 | 0.00 | 0.00 | 3.10 |
| <b>12</b> | N2      | 533 | 0.00 | 0.00 | 0.69 |
| <b>13</b> | JU363   | 129 | 0.78 | 0.02 | 4.24 |
| <b>14</b> | JU1409  | 122 | 0.82 | 0.02 | 4.48 |
| <b>15</b> | JU1200  | 119 | 0.84 | 0.02 | 4.59 |
| <b>16</b> | JU1242  | 117 | 0.85 | 0.02 | 4.67 |
| <b>17</b> | JU751   | 117 | 0.85 | 0.02 | 4.67 |
| <b>18</b> | JU440   | 113 | 0.88 | 0.02 | 4.83 |
| <b>19</b> | EG4349  | 109 | 0.92 | 0.02 | 5.01 |
| <b>20</b> | MY14    | 107 | 0.93 | 0.02 | 5.10 |
| <b>21</b> | JU1652  | 99  | 1.01 | 0.03 | 5.50 |
| <b>22</b> | PB303   | 98  | 1.02 | 0.03 | 5.55 |
| <b>23</b> | ED3046  | 94  | 1.06 | 0.03 | 5.79 |
| <b>24</b> | JU346   | 91  | 1.10 | 0.03 | 5.97 |
| <b>25</b> | JU830   | 322 | 1.55 | 0.51 | 3.59 |
| <b>26</b> | ED3049  | 118 | 1.69 | 0.21 | 5.99 |
| <b>27</b> | CB4852  | 113 | 1.77 | 0.22 | 6.25 |
| <b>28</b> | JU642   | 113 | 1.77 | 0.22 | 6.25 |
| <b>29</b> | JU1400  | 112 | 1.79 | 0.22 | 6.30 |
| <b>30</b> | JU322   | 112 | 1.79 | 0.22 | 6.30 |
| <b>31</b> | JU1896  | 111 | 1.80 | 0.22 | 6.36 |
| <b>32</b> | JU323   | 109 | 1.83 | 0.22 | 6.47 |
| <b>33</b> | CX11285 | 108 | 1.85 | 0.23 | 6.53 |
| <b>34</b> | DL238   | 107 | 1.87 | 0.23 | 6.59 |

|           |         |     |      |      |      |
|-----------|---------|-----|------|------|------|
| <b>35</b> | ED3073  | 106 | 1.89 | 0.23 | 6.65 |
| <b>36</b> | JU847   | 103 | 1.94 | 0.24 | 6.84 |
| <b>37</b> | JU258   | 96  | 2.08 | 0.25 | 7.32 |
| <b>38</b> | ED3048  | 143 | 2.10 | 0.43 | 6.01 |
| <b>39</b> | JU1580  | 95  | 2.11 | 0.26 | 7.40 |
| <b>40</b> | CB4851  | 93  | 2.15 | 0.26 | 7.55 |
| <b>41</b> | CB4932  | 129 | 2.33 | 0.48 | 6.65 |
| <b>42</b> | ED3005  | 120 | 2.50 | 0.52 | 7.13 |
| <b>43</b> | JU345   | 319 | 2.51 | 1.09 | 4.88 |
| <b>44</b> | JT11398 | 118 | 2.54 | 0.53 | 7.25 |
| <b>45</b> | PS2025  | 117 | 2.56 | 0.53 | 7.31 |
| <b>46</b> | ED3077  | 194 | 2.58 | 0.84 | 5.91 |
| <b>47</b> | LKC34   | 114 | 2.63 | 0.55 | 7.50 |
| <b>48</b> | JU397   | 113 | 2.65 | 0.55 | 7.56 |
| <b>49</b> | ED3017  | 112 | 2.68 | 0.56 | 7.63 |
| <b>50</b> | CX11276 | 148 | 2.70 | 0.74 | 6.78 |
| <b>51</b> | PX174   | 111 | 2.70 | 0.56 | 7.70 |
| <b>52</b> | JU1491  | 108 | 2.78 | 0.58 | 7.90 |
| <b>53</b> | MY18    | 108 | 2.78 | 0.58 | 7.90 |
| <b>54</b> | JU774   | 107 | 2.80 | 0.58 | 7.98 |
| <b>55</b> | LSJ1    | 105 | 2.86 | 0.59 | 8.12 |
| <b>56</b> | DL226   | 103 | 2.91 | 0.60 | 8.28 |
| <b>57</b> | ED3052  | 326 | 3.07 | 1.48 | 5.57 |
| <b>58</b> | ED3011  | 93  | 3.23 | 0.67 | 9.14 |
| <b>59</b> | CX11264 | 119 | 3.36 | 0.92 | 8.38 |
| <b>60</b> | JU1395  | 115 | 3.48 | 0.96 | 8.67 |

|           |         |     |      |      |       |
|-----------|---------|-----|------|------|-------|
| <b>61</b> | CX11307 | 114 | 3.51 | 0.96 | 8.74  |
| <b>62</b> | CX11314 | 114 | 3.51 | 0.96 | 8.74  |
| <b>63</b> | ED3040  | 112 | 3.57 | 0.98 | 8.89  |
| <b>64</b> | JU1172  | 109 | 3.67 | 1.01 | 9.13  |
| <b>65</b> | CB4853  | 108 | 3.70 | 1.02 | 9.21  |
| <b>66</b> | JU406   | 108 | 3.70 | 1.02 | 9.21  |
| <b>67</b> | JU775   | 108 | 3.70 | 1.02 | 9.21  |
| <b>68</b> | MY23    | 104 | 3.85 | 1.06 | 9.56  |
| <b>69</b> | RC301   | 104 | 3.85 | 1.06 | 9.56  |
| <b>70</b> | CB4858  | 146 | 4.11 | 1.52 | 8.73  |
| <b>71</b> | PX179   | 121 | 4.13 | 1.36 | 9.38  |
| <b>72</b> | EG4724  | 109 | 4.59 | 1.51 | 10.38 |
| <b>73</b> | EG4725  | 109 | 4.59 | 1.51 | 10.38 |
| <b>74</b> | PB306   | 107 | 4.67 | 1.53 | 10.57 |
| <b>75</b> | EG4946  | 106 | 4.72 | 1.55 | 10.67 |
| <b>76</b> | WN2002  | 100 | 5.00 | 1.64 | 11.28 |
| <b>77</b> | JU1213  | 134 | 5.22 | 2.13 | 10.47 |
| <b>78</b> | QX1211  | 324 | 5.25 | 3.09 | 8.27  |
| <b>79</b> | JU367   | 95  | 5.26 | 1.73 | 11.86 |
| <b>80</b> | JU1212  | 226 | 5.31 | 2.77 | 9.09  |
| <b>81</b> | CB4856  | 731 | 5.47 | 3.94 | 7.38  |
| <b>82</b> | EG4347  | 108 | 5.56 | 2.07 | 11.70 |
| <b>83</b> | QX1233  | 104 | 5.77 | 2.15 | 12.13 |
| <b>84</b> | AB1     | 172 | 5.81 | 2.82 | 10.43 |
| <b>85</b> | JU1568  | 136 | 5.88 | 2.57 | 11.26 |
| <b>86</b> | MY1     | 136 | 5.88 | 2.57 | 11.26 |

Supplementary material for [Alcorn, MR et al], [2016], [Heterotaxy in *Caenorhabditis*: widespread natural variation in L/R arrangement of the major organs], *Phil. Trans. R. Soc. B*. doi: 10.1098/rstb.2015.0404

|            |         |     |       |      |       |
|------------|---------|-----|-------|------|-------|
| <b>87</b>  | JU311   | 115 | 6.09  | 2.48 | 12.14 |
| <b>88</b>  | CX11262 | 179 | 6.15  | 3.11 | 10.73 |
| <b>89</b>  | JU792   | 112 | 6.25  | 2.55 | 12.45 |
| <b>90</b>  | JU782   | 90  | 6.67  | 2.49 | 13.95 |
| <b>91</b>  | JU1581  | 119 | 6.72  | 2.95 | 12.82 |
| <b>92</b>  | CX11271 | 109 | 7.34  | 3.22 | 13.95 |
| <b>93</b>  | CB4854  | 104 | 7.69  | 3.38 | 14.60 |
| <b>94</b>  | JU1586  | 104 | 7.69  | 3.38 | 14.60 |
| <b>95</b>  | JU1246  | 103 | 7.77  | 3.41 | 14.73 |
| <b>96</b>  | DL200   | 127 | 7.87  | 3.84 | 14.00 |
| <b>97</b>  | JU310   | 107 | 8.41  | 3.92 | 15.37 |
| <b>98</b>  | MY16    | 142 | 8.45  | 4.44 | 14.30 |
| <b>99</b>  | CX11315 | 235 | 8.94  | 5.62 | 13.34 |
| <b>100</b> | JU778   | 314 | 11.15 | 7.89 | 15.16 |

**Supplementary Figure 2:** Permuted  $P$  values from Genome-Wide Association Study (GWAS).  $N = 10,000$  permutations. Permuted  $p$  values for each SNP were calculated using a linear model that associates the genotypes of each strain ( $N = 100$  isolates representing 97 unique haplotypes) with permuted, categorical phenotype. Chromosomes are indicated by the numbered boxes (I-V, X) and genomic position along the chromosome is represented in Megabasepairs (Mb) on the x-axis.  $-\log_{10}$  of each  $p$  value is represented on the y-axis.

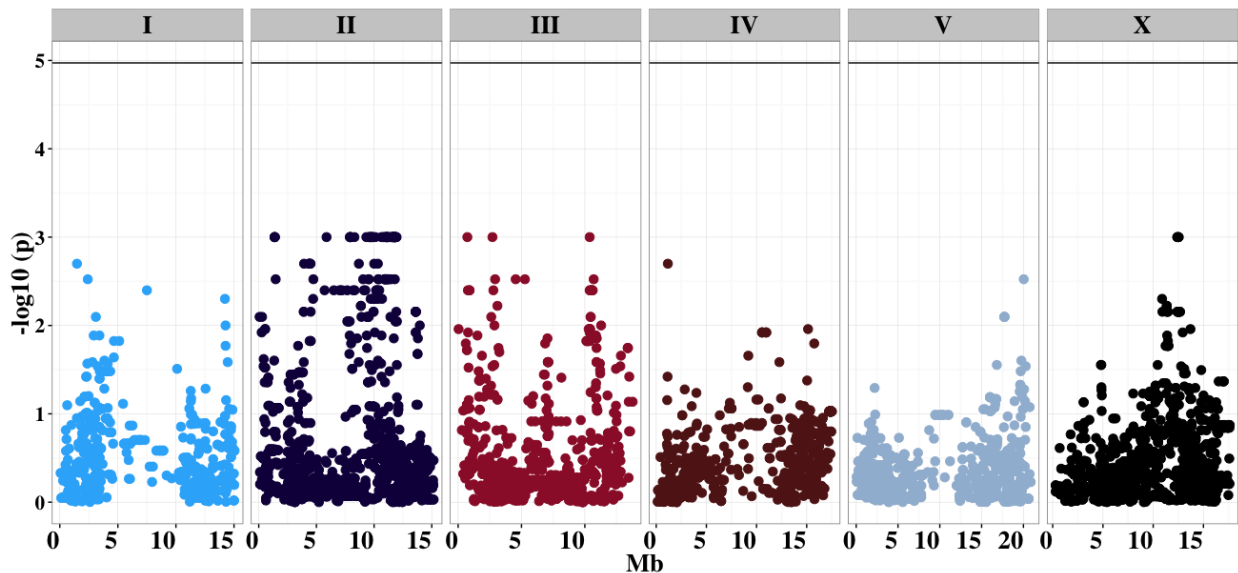

**Supplementary Figure 3:** Frequency of Heterotaxy in *C. elegans* natural isolates is a temperature-sensitive trait in males. Reversals in males of *C. elegans* isolates cultured at 20°C and 25°C. Sample size per isolate ranges from  $90 < n < 750$  at 20°C and  $40 < n < 700$  at 25°C. Black bars represent 95% Binomial proportion confidence intervals calculated using Clopper-Pearson/Exact method (See Materials and Methods).

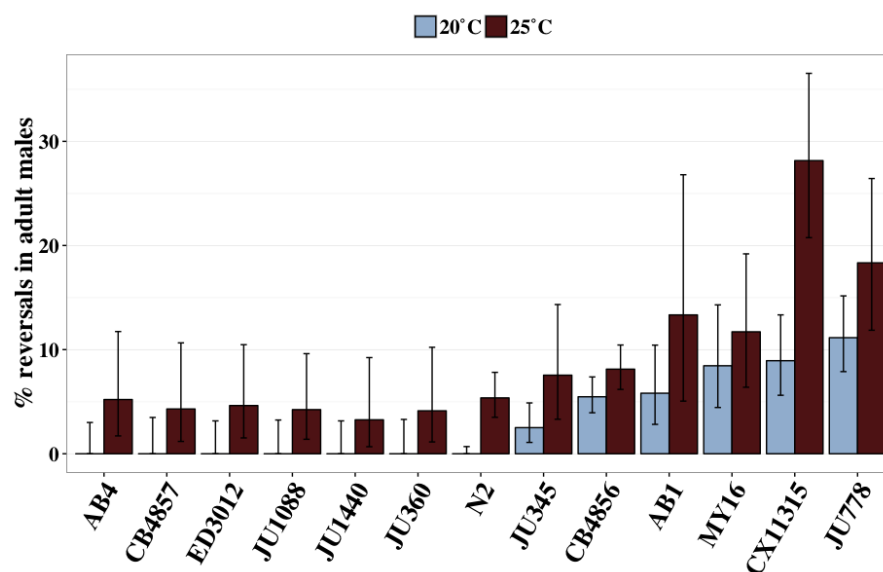

**Supplemental Figure 4:** Complementary data for Figure 7: The propensity for L/R gut-gonad reversals varies widely in adult males of RILs at 20°C. RILs are in ascending order. Black bars represent lower and upper bounds for 95% Binomial proportion confidence intervals calculated using the Clopper-Pearson/Exact method (See Materials and Methods).

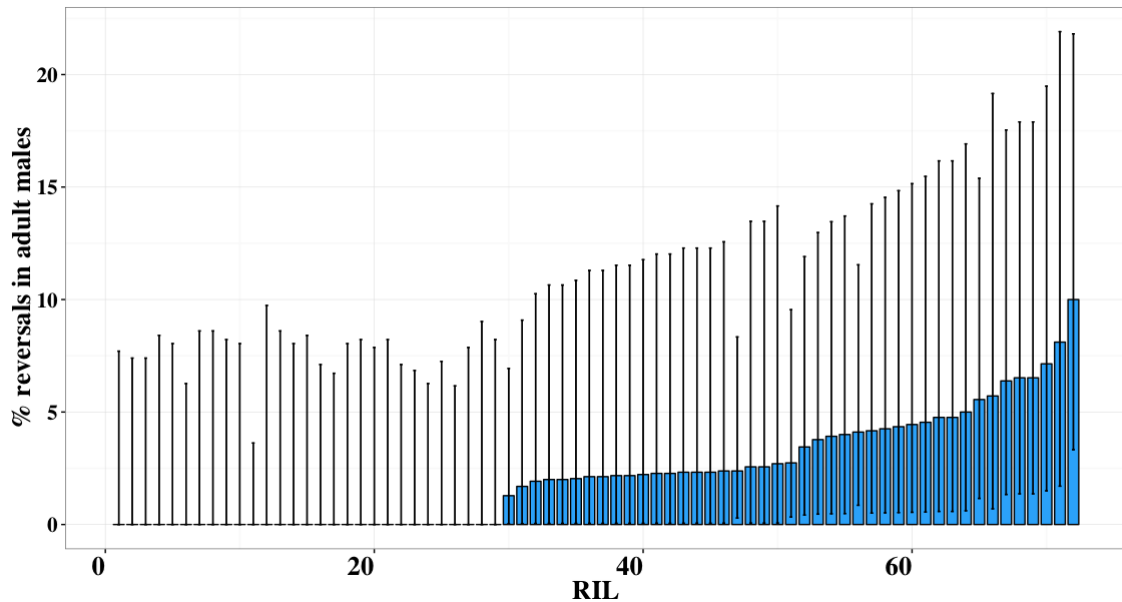

**Supplemental Table 2:** Complementary data for Figure 7: The propensity for L/R gut-gonad reversals widely in adult males of RILs at 20°C. This table includes: RIL name, total sample size, percent reversals and the lower and upper bounds for 95% Binomial proportion confidence intervals calculating using the Clopper-Pearson/Exact method (See Materials and Methods).

| RIL Number | RIL name | Total Sample Size | Reversals % | Lower Bound % | Upper Bound % |
|------------|----------|-------------------|-------------|---------------|---------------|
| 1          | JR3703   | 46                | 0.00        | 0             | 7.71          |
| 2          | JR3709   | 48                | 0.00        | 0             | 7.40          |
| 3          | JR3714   | 48                | 0.00        | 0             | 7.40          |
| 4          | JR3716   | 42                | 0.00        | 0             | 8.41          |
| 5          | JR3720   | 44                | 0.00        | 0             | 8.04          |
| 6          | JR3723   | 57                | 0.00        | 0             | 6.27          |
| 7          | JR3725   | 41                | 0.00        | 0             | 8.60          |
| 8          | JR3727   | 41                | 0.00        | 0             | 8.60          |
| 9          | JR3728   | 43                | 0.00        | 0             | 8.22          |
| 10         | JR3729   | 44                | 0.00        | 0             | 8.04          |

|           |        |     |      |      |       |
|-----------|--------|-----|------|------|-------|
| <b>11</b> | JR3734 | 100 | 0.00 | 0    | 3.62  |
| <b>12</b> | JR3738 | 36  | 0.00 | 0    | 9.74  |
| <b>13</b> | JR3739 | 41  | 0.00 | 0    | 8.60  |
| <b>14</b> | JR3741 | 44  | 0.00 | 0    | 8.04  |
| <b>15</b> | JR3742 | 42  | 0.00 | 0    | 8.41  |
| <b>16</b> | JR3744 | 50  | 0.00 | 0    | 7.11  |
| <b>17</b> | JR3745 | 53  | 0.00 | 0    | 6.72  |
| <b>18</b> | JR3747 | 44  | 0.00 | 0    | 8.04  |
| <b>19</b> | JR3750 | 43  | 0.00 | 0    | 8.22  |
| <b>20</b> | JR3752 | 45  | 0.00 | 0    | 7.87  |
| <b>21</b> | JR3753 | 43  | 0.00 | 0    | 8.22  |
| <b>22</b> | JR3754 | 50  | 0.00 | 0    | 7.11  |
| <b>23</b> | JR3757 | 52  | 0.00 | 0    | 6.85  |
| <b>24</b> | JR3758 | 57  | 0.00 | 0    | 6.27  |
| <b>25</b> | JR3763 | 49  | 0.00 | 0    | 7.25  |
| <b>26</b> | JR3767 | 58  | 0.00 | 0    | 6.16  |
| <b>27</b> | JR3770 | 45  | 0.00 | 0    | 7.87  |
| <b>28</b> | JR3772 | 39  | 0.00 | 0    | 9.03  |
| <b>29</b> | JR3774 | 43  | 0.00 | 0    | 8.22  |
| <b>30</b> | JR3707 | 78  | 1.28 | 0.03 | 6.94  |
| <b>31</b> | JR3731 | 59  | 1.69 | 0.04 | 9.09  |
| <b>32</b> | JR3756 | 52  | 1.92 | 0.05 | 10.26 |
| <b>33</b> | JR3732 | 50  | 2.00 | 0.05 | 10.65 |
| <b>34</b> | JR3737 | 50  | 2.00 | 0.05 | 10.65 |
| <b>35</b> | JR3748 | 49  | 2.04 | 0.05 | 10.85 |
| <b>36</b> | JR3701 | 47  | 2.13 | 0.05 | 11.29 |



|           |        |    |      |      |       |
|-----------|--------|----|------|------|-------|
| <b>37</b> | JR3711 | 47 | 2.13 | 0.05 | 11.29 |
| <b>38</b> | JR3699 | 46 | 2.17 | 0.06 | 11.53 |
| <b>39</b> | JR3724 | 46 | 2.17 | 0.06 | 11.53 |
| <b>40</b> | JR3733 | 45 | 2.22 | 0.06 | 11.77 |
| <b>41</b> | JR3726 | 44 | 2.27 | 0.06 | 12.02 |
| <b>42</b> | JR3755 | 44 | 2.27 | 0.06 | 12.02 |
| <b>43</b> | JR3708 | 43 | 2.33 | 0.06 | 12.29 |
| <b>44</b> | JR3712 | 43 | 2.33 | 0.06 | 12.29 |
| <b>45</b> | JR3760 | 43 | 2.33 | 0.06 | 12.29 |
| <b>46</b> | JR3740 | 42 | 2.38 | 0.06 | 12.57 |
| <b>47</b> | JR3743 | 84 | 2.38 | 0.29 | 8.34  |
| <b>48</b> | JR3698 | 39 | 2.56 | 0.06 | 13.48 |
| <b>49</b> | JR3751 | 39 | 2.56 | 0.06 | 13.48 |
| <b>50</b> | JR3718 | 37 | 2.70 | 0.07 | 14.16 |
| <b>51</b> | JR3722 | 73 | 2.74 | 0.33 | 9.55  |
| <b>52</b> | JR3762 | 58 | 3.45 | 0.42 | 11.91 |
| <b>53</b> | JR3765 | 53 | 3.77 | 0.46 | 12.98 |
| <b>54</b> | JR3697 | 51 | 3.92 | 0.48 | 13.46 |
| <b>55</b> | JR3736 | 50 | 4.00 | 0.49 | 13.71 |
| <b>56</b> | JR3749 | 73 | 4.11 | 0.86 | 11.54 |
| <b>57</b> | JR3706 | 48 | 4.17 | 0.51 | 14.25 |
| <b>58</b> | JR3693 | 47 | 4.26 | 0.52 | 14.54 |
| <b>59</b> | JR3746 | 46 | 4.35 | 0.53 | 14.84 |
| <b>60</b> | JR3702 | 45 | 4.44 | 0.54 | 15.15 |
| <b>61</b> | JR3766 | 44 | 4.55 | 0.56 | 15.47 |
| <b>62</b> | JR3710 | 42 | 4.76 | 0.58 | 16.16 |

Supplementary material for [Alcorn, MR et al], [2016], [Heterotaxy in *Caenorhabditis*: widespread natural variation in L/R arrangement of the major organs], *Phil. Trans. R. Soc. B*. doi: 10.1098/rstb.2015.0404

|           |        |    |       |      |       |
|-----------|--------|----|-------|------|-------|
| <b>63</b> | JR3735 | 42 | 4.76  | 0.58 | 16.16 |
| <b>64</b> | JR3721 | 40 | 5.00  | 0.61 | 16.92 |
| <b>65</b> | JR3696 | 54 | 5.56  | 1.16 | 15.39 |
| <b>66</b> | JR3713 | 35 | 5.71  | 0.70 | 19.16 |
| <b>67</b> | JR3695 | 47 | 6.38  | 1.34 | 17.54 |
| <b>68</b> | JR3700 | 46 | 6.52  | 1.37 | 17.90 |
| <b>69</b> | JR3719 | 46 | 6.52  | 1.37 | 17.90 |
| <b>70</b> | JR3730 | 42 | 7.14  | 1.50 | 19.48 |
| <b>71</b> | JR3764 | 37 | 8.11  | 1.70 | 21.91 |
| <b>72</b> | JR3715 | 50 | 10.00 | 3.33 | 21.81 |
